# Supplementary material for: Findings of a Novel Barbershop‐Based Peripheral Artery Disease Screening Program for Black Men
Source: PubMed Central journal article supplement — J Am Heart Assoc. 2022 Oct 17;11(20):e026347. doi: 10.1161/JAHA.122.026347 (PMC9673675; doi:10.1161/jaha.122.026347), 2022-10-17
Supplement: JAH3-11-e026347-s001.pdf [file JAH3-11-e026347-s001.pdf]

# **SUPPLEMENTAL MATERIAL**

## Data S1.

### PAD Awareness Assessment.

The percent of participants (out of N=28 respondents) who selected each answer is listed in parentheses. Correct answers are in bold.

1. How would you describe your level of understanding about PAD?
  - High (“I’m an expert”) – 0 (0%)
  - Partial (“I know some things”) – 4 (14%)
  - Low (“I might have heard of it”) – 5 (18%)
  - Non-existent (“I’ve never heard of it before this study”) – 19 (68%)
  
2. Which of the following medical problems increase the risk of developing PAD?  
(Please check all that apply):
  - Hypertension – 14 (50%)**
  - Diabetes – 12 (43%)**
  - Cigarette smoking – 14 (50%)**
  - High cholesterol– 14 (50%)**
  
3. Sign(s) that you may have PAD can include (please check all that apply):
  - Pain in the buttocks, hips, or legs with walking – 13 (46%)**
  - Headaches with walking – 8 (29%)
  - No symptoms – 7 (25%)**
  - Ulcers on feet – 7 (25%)**
  
4. Having PAD can increase the risk of heart attack.
  - True - 25 (89%)**
  - False - 3 (11%)
  
5. Amputation is one of the severe consequences of untreated PAD.
  - True - 20 (71%)**
  - False - 8 (29%)
  
6. Signs of critical limb ischemia (CLI), which is the most severe type of PAD, can include (please check all that apply):
  - Absent pulses in the foot – 12 (43%)**
  - Cool and pale foot - 8 (29%)**
  - Painless, swollen legs – 11 (39%)
  - Sore that won’t heal on the foot – 6 (21%)**
  - Pain in legs at rest – 15 (54%)**

7. Supervised exercise has been shown to be as or more effective at improving walking ability in patients with PAD than putting in a stent to open the blockage.  
**True - 24 (86%)**  
 False - 4 (14%)
8. Black men are more likely than White men to have which condition(please check all that apply):  
 **Hypertension – 17 (61%)**  
 **Diabetes – 18 (64%)**  
 **Peripheral artery disease (PAD) – 9 (32%)**  
 Atrial fibrillation (irregular heartbeat) – 9 (32%)
9. In addition to poor health outcomes, untreated PAD can have a negative impact on how a person experiences life (quality of life).  
**True -26 (93%)**  
 False - 2 (7%)

Algorithm for the PAD Assessment Questionnaire

1. High=3, Partial=2, Low=1, Non-existent=0
2. 1 point for each box checked (up to 4 points)
3. Headaches with walking (no points), all other answers (1 point each, up to 3 points)
4. True=1 point, False=0 points
5. True=1 point, False=0 points
6. Painless, swollen legs (no points), all other answers (1 point each, up to 4 points)
7. True=1 point, False=0 points
8. Atrial fibrillation (no points), all other answers (1 point each, up to 3 points)
9. True=1 point, False=0 points

Point range: 0 - 21

Score 0-8: Poor PAD Awareness; 9-21: Good PAD Awareness
